# Supplementary material for: Shaping ability of WaveOne Gold and OneReci by using two apical sizes: a micro-computed tomographic assessment
Source: PeerJ. 2023 Apr 27;11:e15208. doi: 10.7717/peerj.15208 (PMC10149051; doi:10.7717/peerj.15208)
Supplement: Data S1 [file peerj-11-15208-s001.xlsx]

## Sheet: Volume
	Mesiobuccal canals			Mesiolingual canals
Sample numbers	Unprepared	After first preparation	After second preparation	Unprepared	After first preparation	After second preparation
1	2.399	2.553	2.92	1.066	1.749	2.637
2	1.231	2.007	2.752	0.82	2.787	3.574
3	0.503	1.501	2.063	0.647	0.71	1.098
5	1.534	1.831	2.812	1.424	1.916	2.035
7	1.009	1.27	1.855	0.895	2.149	3.244
8	0.821	1.149	2.557	0.578	1.378	1.686
10	1.898	2.141	3.366	1.244	2.374	2.525
11	1.26	2.211	2.952	0.875	1.393	2.009
13	0.588	0.81	1.153	0.632	1.101	1.655
15	1.16	1.364	2.282	1.274	3.384	4.295

## Sheet: Unprepared surface
	Unprepared		After preparation		After second preparation
	surface		surface		surface
Sample numbers	mesiobuccal canals	mesiolingual canals	mesiobuccal	mesiolingual	mesiobuccal	mesiolingual
1	0.365249	0.221204	0.0986292	0.056031	0.112843	0.0222892
2	0.35018	0.340843	0.07501	0.0281749	0.039013	0.020649
3	0.154565	0.141883	0.026667	0.049915	0.015209	0.029473
5	0.259688	0.242993	0.081101	0.0764042	0.034202	0.067498
7	0.218432	0.204928	0.065794	0.032705	0.0364903	0.018558
8	0.175337	0.157548	0.0644357	0.029722	0.016424	0.0307193
10	0.349338	0.297747	0.110661	0.0497252	0.051552	0.041012
11	0.245279	0.197523	0.0487937	0.0596275	0.0354613	0.028211
13	0.152857	0.168698	0.0568921	0.031001	0.0328921	0.0308036
15	0.23671	0.266176	0.0760125	0.022492	0.039854	0.0106782

## Sheet: Transportation
		mesiobuccal						mesiolingual
		3mm		6 mm		9 mm		3mm		6 mm		9 mm
	Sample numbers	x1-x2	y1-y2	x1-x2	y1-y2	x1-x2	y1-y2	x1-x2	y1-y2	x1-x2	y1-y2	x1-x2	y1-y2
After first preparation	1	0.0001	0.047	0.0001	0.0001	0.0001	0.0001	0.04	0.038	0.08	0.02	0.0001	0.13
	2	0.01	0.035	0.02	0.365	0.13	0.14	0.014	0.05	0.17	0.135	0.19	0.3
	3	0.19	0.1	0.01	0.4	0.01	0.39	0.01	0.11	0	0.003	0.01	0.004
	5	0.02	0.01	0.0001	0.007	0.0001	0.001	0.05	0.442	0.03	0.01	0.035	0.2
	7	0.07	0.001	0.0001	0.001	0.01	0.13	0.03	0.04	0.13	0.15	0.03	0.3
	8	0.04	0.01	0.01	0.17	0.01	0.02	0.05	0.09	0.09	0.2	0.01	0.2
	10	0.0001	0.001	0.0001	0.001	0.03	0.02	0.06	0.1	0.1	0.14	0.06	0.05
	11	0.0001	0.001	0.02	0.18	0.04	0.18	0.05	0.02	0.07	0.06	0.01	0.07
	13	0.01	0.06	0.01	0.07	0.01	0.04	0.01	0.1	0.01	0.15	0.01	0.2
	15	0.018	0.01	0.006	0.01	0.01	0.09	0.01	0.02	0.1	0.09	0.11	0.3
		3mm		6 mm		9 mm		3mm		6 mm		9 mm
		x1-x3	y1-y3	x1-x3	y1-y3	x1-x3	y1-y3	x1-x3	y1-y3	x1-x3	y1-y3	x1-x3	y1-y3
After second preparation	1	0.09	0.08	0.0001	0.008	0.01	0.01	0.09	0.07	0.08	0.03	0.09	0.09
	2	0.06	0.06	0.0001	0.02	0.1	0.17	0.1	0.09	0.3	0.2	0.2	0.21
	3	0.2	0.11	0.02	0.3	0.05	0.3	0.04	0.03	0.01	0.05	0.02	0.05
	5	0.09	0.06	0.03	0.09	0.09	0.2	0.03	0.07	0.05	0.1	0.04	0.2
	7	0.16	0.1	0.03	0.07	0.04	0.2	0.1	0.12	0.15	0.2	0.06	0.3
	8	0.1	0.07	0.1	0.3	0.01	0.09	0.04	0.08	0.06	0.2	0.01	0.1
	10	0.04	0.01	0.04	0.04	0.1	0.07	0.06	0.03	0.01	0.02	0.02	0.03
	11	0.06	0.04	0.05	0.1	0.1	0.16	0.9	0.99	0.09	0.14	0.05	0.06
	13	0.05	0.04	0.01	0.1	0.01	0.17	0.03	0.1	0.03	0.3	0.04	0.43
	15	0.06	0.07	0.06	0.1	0.01	0.09	0.9	0.1	0.15	0.1	0.08	0.3

## Sheet: Time
	OR	WOG	OG (sn)	OR 25	First preparation (OG+OR)	OR 35	WOGG	WOG 25	First preparation (WOGG+WOG)	WOG 35
1	MB canal	ML canal	6.3	10.3	16.6	9.41	8.4	18.4	26.8	22.15
2	MB canal	ML canal	8	23.84	31.84	26.48	14	35.3	49.3	24.77
3	ML canal	MB canal	6.5	11.19	17.69	26.13	12	29	41	8.99
5	ML canal	MB canal	3.5	5.63	9.13	5.13	8.15	10.06	18.21	18.36
7	MB canal	ML canal	8.5	13	21.5	40.98	10	35.11	45.11	21.17
8	ML canal	MB canal	8.34	13.29	21.63	12.6	8.15	10.06	18.21	18.36
10	ML canal	MB canal	6.38	9.85	16.23	9.51	8.68	20.84	29.52	24.46
11	ML canal	MB canal	5.73	22.58	28.31	20.99	6.9	18.5	25.4	9.78
13	MB canal	ML canal	8	37.51	45.51	12.53	9	26.75	35.75	14.89
15	MB canal	ML canal	6	14.19	20.19	32.78	8.6	30	38.6	9.33
